# Supplementary material for: Modeling the Cost of Inaction in Treating Obesity in Canada
Source: Research Square preprint supplement (doi:10.21203/rs.3.rs-4921188/v1), 2024-09-13
Supplement: Supplementary file 1 [file c32932d048a9fdb47f58e730.docx]

**Appendix**

**Table 1. Obesity prevalence and number of persons with obesity in Canada**

| **Age group** | **Obesity prevalence** | | **Number of persons with obesity** | | **Reference** |
| --- | --- | --- | --- | --- | --- |
| **Male** | **Female** | **Male** | **Female** |
| 18-34 | 22.6% | 22.1% | 955,200 | 974,800 | (Statistics Canada, 2017) |
| 35-49 | 32.6% | 33.6% | 1,258,100 | 1,132,100 |
| 50-64 | 33.3% | 34.7% | 1,284,600 | 1,185,800 |
| 65+ | 28.8% | 28.2% | 869,500 | 1,045,400 |

**Table 2. Average price of healthcare service**

| **Parameters** | **Value** | **Reference** |
| --- | --- | --- |
| Emergency department (per visit) | $348 | (Canadian Institute for Health Information, 2020) |
| Generalist doctor (per visit) | $90 | (Canadian Institute for Health Information, 2022b) |
| Specialist doctor (per visit) | $142 | (Canadian Institute for Health Information, 2022b) |
| Inpatient hospital stay (per day) | 1,213 | (Canadian Institute for Health Information, 2023) |
| Prescription drug (per refill) | $30 | (Canadian Institute for Health Information, 2022a; Statistics Canada, 2021c) |
| Home health care (per visit) | $60 | (Closing the Gap Healthcare Group, 2019) |
| LTC facility (per year) | $63,016 | (Adamovic, 2024; Guliani et al., 2021) |

**Table 3. Relative risk of obesity related comorbidities for estimation of obesity related mortality**

| **Co-morbid condition​** | **Obesity (M)​** | **Obesity (F)​** |
| --- | --- | --- |
| Alcoholic liver disease​ | 1.50​ | 1.50​ |
| Brain cancer​ | 0.91​ | 0.91​ |
| Cerebral infarction​ | 1.44​ | 1.44​ |
| Cerebrovascular diseases​ | 1.26​ | 1.26​ |
| Chronic obstructive bronchitis​ | 0.91​ | 0.91​ |
| Circulatory and respiratory symptoms​ | 1.50​ | 1.50​ |
| Death​ | 1.26​ | 1.26​ |
| Dementia​ | 0.76​ | 0.76​ |
| Digestive and abdominal symptoms​ | 1.14​ | 1.14​ |
| Disease of the genitourinary system​ | 1.36​ | 1.36​ |
| Disease of the liver​ | 2.16​ | 2.16​ |
| Diseases of the blood​ | 1.48​ | 1.48​ |
| Diseases of the circulatory system​ | 1.50​ | 1.50​ |
| Diseases of the digestive system​ | 1.27​ | 1.27​ |
| Diseases of the MSK system​ | 1.61​ | 1.61​ |
| Diseases of the nervous system​ | 1.66​ | 1.66​ |
| Disorders due to substance abuse​ | 0.78​ | 0.78​ |
| Epilepsy​ | 0.93​ | 0.93​ |
| Headaches​ | 1.22​ | 1.22​ |
| Influenza and pneumonia​ | 1.31​ | 1.31​ |
| Ischaemic heart disease​ | 1.69​ | 1.69​ |
| Leukaemia, lymphoma​ | 1.12​ | 1.12​ |
| Lung cancer​ | 0.80​ | 0.80​ |
| Melanoma​ | 0.87​ | 0.87​ |
| Mood disorders​ | 1.16​ | 1.16​ |
| Myocardial infarction​ | 1.60​ | 1.60​ |
| Neurotic Disorder​ | 1.12​ | 1.12​ |
| Parkinson's disease​ | 0.74​ | 0.74​ |
| Pulmonary embolism​ | 2.42​ | 2.42​ |
| Renal failure​ | 2.42​ | 2.42​ |
| Sleep disorders​ | 4.43​ | 4.43​ |
| Soft tissue disorders​ | 1.45​ | 1.45​ |
| Transient ischaemic attack​ | 1.30​ | 1.30​ |
| Viral infections​ | 1.19​ | 1.19​ |
| Anaemia​ | 1.50​ | 1.50​ |
| Arrhythmias​ | 1.63​ | 1.63​ |
| Arteriosclerosis​ | 1.16​ | 1.16​ |
| Esophagus Cancer​ | 1.21​ | 1.20​ |
| Low Back Pain​ | 2.81​ | 2.81​ |
| Uterine Cancer​ | ​NA | 2.16​ |
| Alzheimer's and Vascular Dementia​ | 2.04​ | 2.04 ​ |
| Chronic Back Pain​ | 2.81​ | 2.81​ |
| Coronary Heart Disease​ | 1.69​ | 1.69​ |
| Dyslipidemia​ | 1.74​ | 1.74​ |
| End Stage Renal Disease​ | 3.57​ | 3.57​ |
| Esophageal Adenocarcinoma​ | 2.30​ | 2.30 ​ |
| Gallbladder Cancer​ | 2.00​ | 2.00 ​ |
| Gallbladder Disease​ | 1.88​ | 1.88 ​ |
| Gastric Cardia Adenocarcinoma​ | 2.00​ | 2.00 ​ |
| Liver Cancer​ | 1.48​ | 1.48 ​ |
| Kidney cancer​ | 1.88​ | 1.98​ |
| Breast cancer​ | ​NA | 1.21​ |
| Osteoarthritis​ | 3.24​ | 2.52​ |
| Ovarian Cancer​ | ​NA | 1.19​ |
| Pancreatic Cancer​ | 1.78​ | 1.60​ |
| Asthma​ | 2.02​ | 2.06​ |
| Colorectal cancer​ | 1.39​ | 1.36​ |
| Diabetes​ | 5.54​ | 6.26​ |
| Heart failure​ | 2.91​ | 2.91​ |
| Hypertension​ | 2.12​ | 2.19​ |
| Prostate cancer​ | 0.95​ | ​NA |
| Stroke​ | 1.36​ | 1.36​ |

Reference: Sample-size-weighted averages from multiple sources (Guh et al., 2009; Kivimäki et al., 2022; Ndumele et al., 2016) and leading cause of death in Canada (Statistics Canada, 2021b)

**Table 4. Employment number and rate by age group and gender**

| **Age group** | **Gender** | **Employment rate** | **Reference** |
| --- | --- | --- | --- |
| 15-24 | Male | 54.7% | (Statistics Canada, 2018) |
| 25 to 54 years | Male | 85.4% |
| 55 to 64 years | Male | 68.3% |
| 15 to 24 years | Female | 56.3% |
| 25 to 54 years | Female | 78.9% |
| 55 to 64 years | Female | 57.8% |

**Table 5. Total personal income from all sources**

| **Income level** | **Proxy income** | **% Males in Income Category** | **% Females in Income Category** | **Reference** |
| --- | --- | --- | --- | --- |
| Less than $20,000 | $10,000 | 19% | 32% | (Statistics Canada, 2023) |
| $20,000 - $39,999 | $30,000 | 23% | 28% |
| $40,000 - $59,999 | $50,000 | 19% | 19% |
| $60,000 - $79,999 | $70,000 | 15% | 10% |
| $80,000 or more | $90,000 | 24% | 11% |

**Table 6. Federal and provincial individual effective tax rates**

| **Age group** | **Tax rate** | **Reference** |
| --- | --- | --- |
| 18-34 | 7.4% | (Statistics Canada, 2021a) |
| 35-49 | 15.0% |
| 50-64 | 13.9% |
| 65-75 | 7.0% |
| All | 12.2% |

**Table 7. Potential federal and provincial tax implication**

|  | **Amount (Billion $)** | **Reference** |
| --- | --- | --- |
| Estimated total indirect cost of obesity | $21.8 |  |
| 2023 Canada GDP | $2,204 | (Statistics Canada, 2024) |
| % of indirect cost to GDP | 1.0% |  |
| Total sales tax | $202.8 |  |
| Total corporate tax | $116.8 |  |
| Sum of sale and corporate tax | $319.6 |  |
| Reduced federal and provincial sales and corporate tax revenue | $3.2 | (Organisation for Economic & Co-operation and Development, 2022) |
| Reduced federal and provincial income tax revenue | $2.0 | (Organisation for Economic & Co-operation and Development, 2022) |
| Total tax implication | $5.1 |  |

**Table 8. Model input parameters for sensitivity analysis**

| **Economic outcome** | **Key input parameters** |
| --- | --- |
| Direct medical service cost | 95% confidence interval of obesity-related medical service utilization |
| long term care cost | ±15% variation on per capita cost of long-term care facility |
| Higher pension cost due to obesity-related disability | 95% confidence interval of proportion of adults with obesity-related disability |
| Lost productivity due to excess mortality | Minimum and maximum value in population attributable fraction of each condition |
| Absenteeism due to obesity-related chronic conditions | 95% confidence interval in proportion of employees affected by obesity |
| Absenteeism due to obesity-related injuries | 95% confidence interval in proportion of employees affected by obesity |
| Presenteeism | Estimated scale of productivity reduction due to obesity |
| Less income due to reduced work force participation | 95% confidence interval in proportion of adults out of workforce due to obesity |
| Less personal income associated with obesity | 95% confidence interval in proportion of employees affected by obesity |

**References**

Adamovic, M. (2024, May). *Summary of cost of living in Canada*. Numbeo Cost of Living Database. https://www.numbeo.com/cost-of-living/country_result.jsp?country=Canada

Canadian Institute for Health Information. (2020). *Hospital spending: Focus on the emergency department*. CIHI.

Canadian Institute for Health Information. (2022a, November). *Trends in public drug program spending in Canada*. https://www.cihi.ca/en/trends-in-public-drug-program-spending-in-canada

Canadian Institute for Health Information. (2022b, November 17). *An overview of physician payments and cost per service | CIHI*. https://www.cihi.ca/en/health-workforce-in-canada-in-focus-including-nurses-and-physicians/an-overview-of-physician

Canadian Institute for Health Information. (2023, May). *Cost of a Standard Hospital Stay*. https://yourhealthsystem.cihi.ca/hsp/inbrief?lang=en#!/indicators/015/cost-of-a-standard-hospital-stay-cshs/;mapC1;mapLevel2;provinceC9001;/

Closing the Gap Healthcare Group. (2019, May 20). Home Care Costs in Ontario—A Complete Breakdown. *Closing the Gap*. https://www.closingthegap.ca/home-care-costs-in-ontario-a-complete-breakdown/

Guh, D. P., Zhang, W., Bansback, N., Amarsi, Z., Birmingham, C. L., & Anis, A. H. (2009). The incidence of co-morbidities related to obesity and overweight: A systematic review and meta-analysis. *BMC Public Health*, *9*, 88. https://doi.org/10.1186/1471-2458-9-88

Guliani, H., Hadjistavropoulos, T., Jin, S., & Lix, L. M. (2021). Pain-related health care costs for long-term care residents. *BMC Geriatrics*, *21*(1), 552. https://doi.org/10.1186/s12877-021-02424-2

Kivimäki, M., Strandberg, T., Pentti, J., Nyberg, S. T., Frank, P., Jokela, M., Ervasti, J., Suominen, S. B., Vahtera, J., Sipilä, P. N., Lindbohm, J. V., & Ferrie, J. E. (2022). Body-mass index and risk of obesity-related complex multimorbidity: An observational multicohort study. *The Lancet. Diabetes & Endocrinology*, *10*(4), 253–263. https://doi.org/10.1016/S2213-8587(22)00033-X

Ndumele, C. E., Matsushita, K., Lazo, M., Bello, N., Blumenthal, R. S., Gerstenblith, G., Nambi, V., Ballantyne, C. M., Solomon, S. D., Selvin, E., Folsom, A. R., & Coresh, J. (2016). Obesity and Subtypes of Incident Cardiovascular Disease. *Journal of the American Heart Association*, *5*(8), e003921. https://doi.org/10.1161/JAHA.116.003921

Organisation for Economic & Co-operation and Development. (2022). *Details of Tax Revenue—Canada*. https://stats.oecd.org/Index.aspx?DataSetCode=REVCAN

Statistics Canada. (2017, March 22). *Health characteristics, annual estimates*. https://www150.statcan.gc.ca/t1/tbl1/en/tv.action?pid=1310009601

Statistics Canada. (2018, June 27). *Labour force characteristics by age group, monthly, seasonally adjusted*. https://www150.statcan.gc.ca/t1/tbl1/en/tv.action?pid=1410028702

Statistics Canada. (2021a, April 13). *Federal and provincial individual effective tax rates*. https://www150.statcan.gc.ca/t1/tbl1/en/cv.action?pid=1110005401

Statistics Canada. (2021b, April 13). *Leading causes of death, total population, by age group*. https://www150.statcan.gc.ca/t1/tbl1/en/tv.action?pid=1310039401

Statistics Canada. (2021c, June 28). *The Daily—Prescription medication use among Canadian adults, 2016 to 2019*. https://www150.statcan.gc.ca/n1/daily-quotidien/210628/dq210628e-eng.htm

Statistics Canada. (2023, December 18). *Canadian Community Health Survey—Annual Component (CCHS)*. https://www23.statcan.gc.ca/imdb/p2SV.pl?Function=getSurvey&SDDS=3226

Statistics Canada. (2024, April). *Gross domestic product (GDP) at basic prices, by industry, monthly, growth rates*. https://www150.statcan.gc.ca/t1/tbl1/en/tv.action?pid=3610043402
